# Supplementary material for: Surfactant-free synthesis of octahedral ZnO/ZnFe2O4 heterostructure with ultrahigh and selective adsorption capacity of malachite green
Source: PubMed Central journal article supplement (PMC4855229; doi:10.1038/srep25074), 2016-05-04
Supplement: srep25074-s1.pdf [file srep25074-s1.pdf]

## Supplementary Information

Surfactant-free synthesis of octahedral ZnO/ZnFe<sub>2</sub>O<sub>4</sub> heterostructure with ultrahigh and selective adsorption capacity of malachite green

Jue Liu<sup>1</sup>, Min Zeng<sup>\*1</sup> & Ronghai Yu<sup>\*1</sup>

<sup>1</sup>School of Materials Science and Engineering, Beihang University, Beijing 100191, China.

Correspondence and requests for materials should be addressed to M. Z. (min\_zeng@buaa.edu.cn)

or to R. Y. (rhyu@buaa.edu.cn).

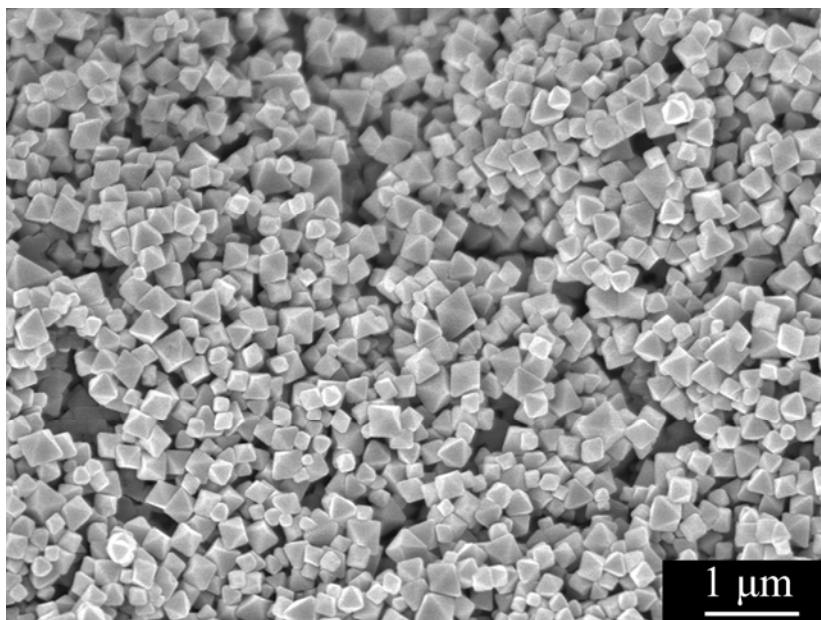

**Figure S1 | SEM image of the octahedral precursor with an average size of about 200 nm.**

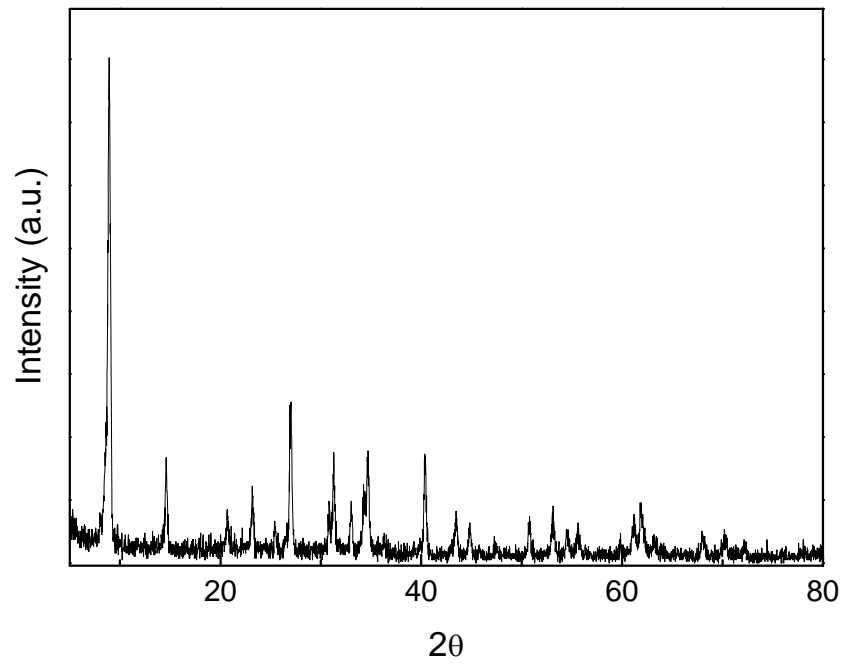

**Figure S2 | XRD pattern of the octahedral precursor.**

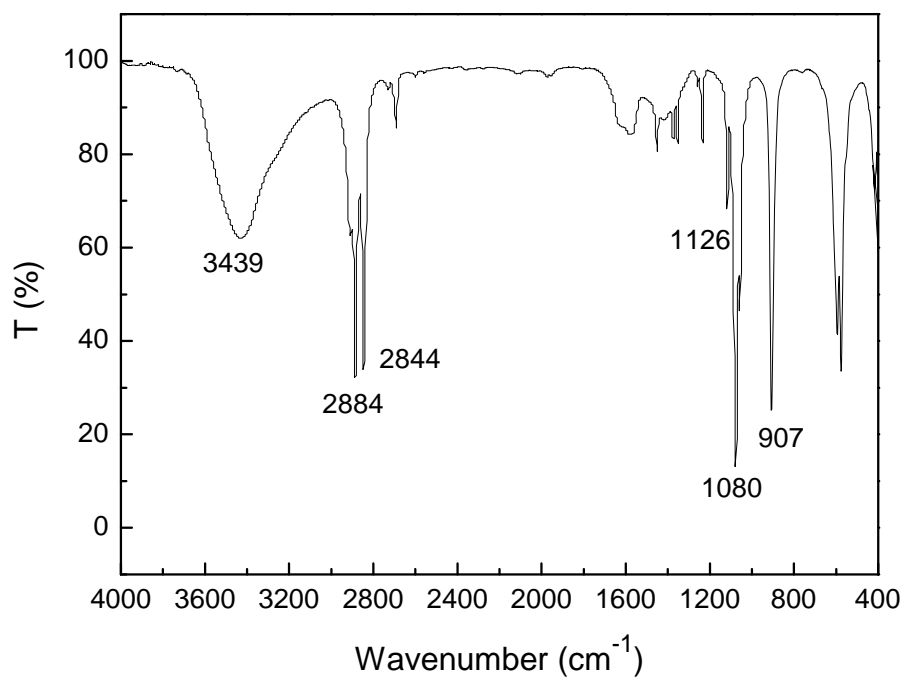

**Figure S3 | Fourier transform IR (FTIR) spectra of the octahedral precursor.**

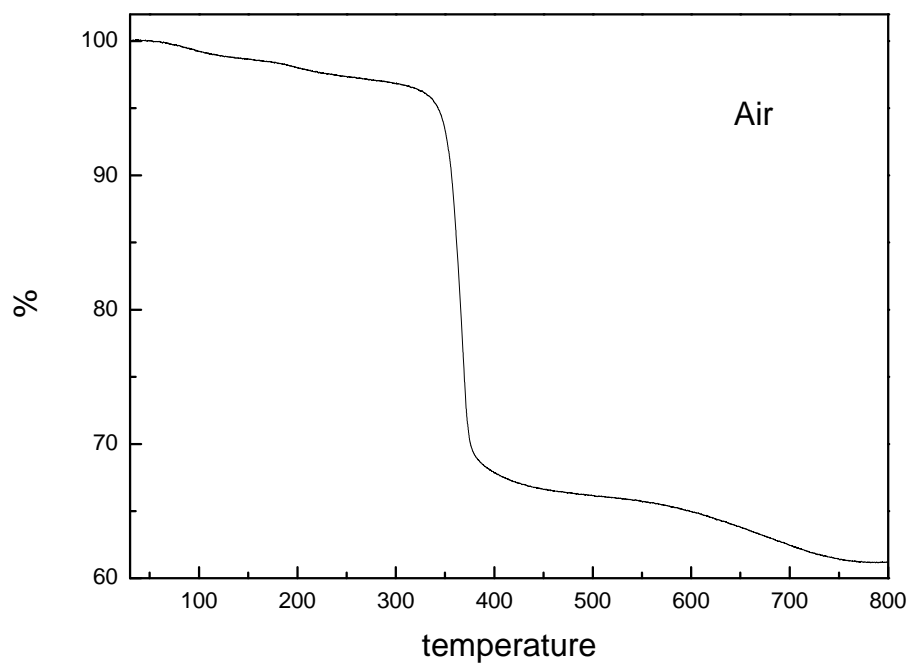

**Figure S4 | TGA curve of the weight loss from room temperature to 800 °C.**

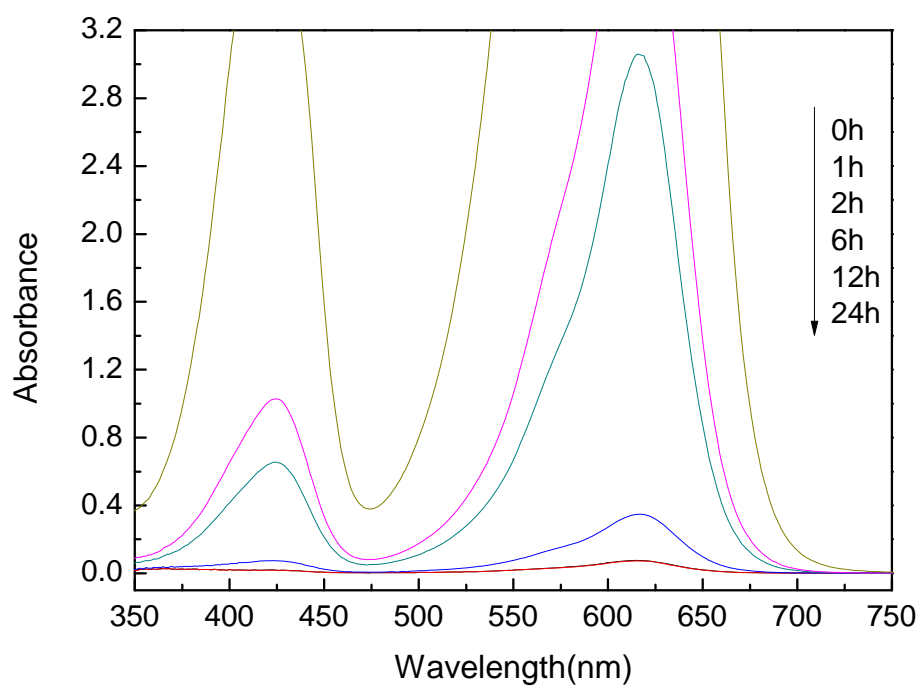

**Figure S5 | The temporal evolution of UV spectra of MG solution (0.5 g·L<sup>-1</sup>)**

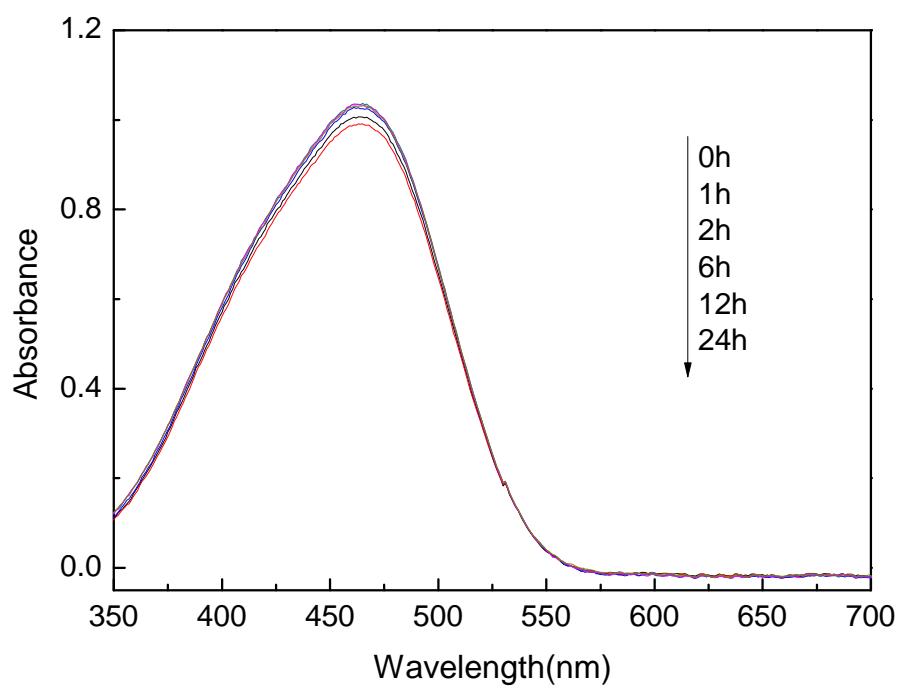

**Figure S6 | The temporal evolution of UV spectra of MO solution ( $10 \text{ mg}\cdot\text{L}^{-1}$ )**

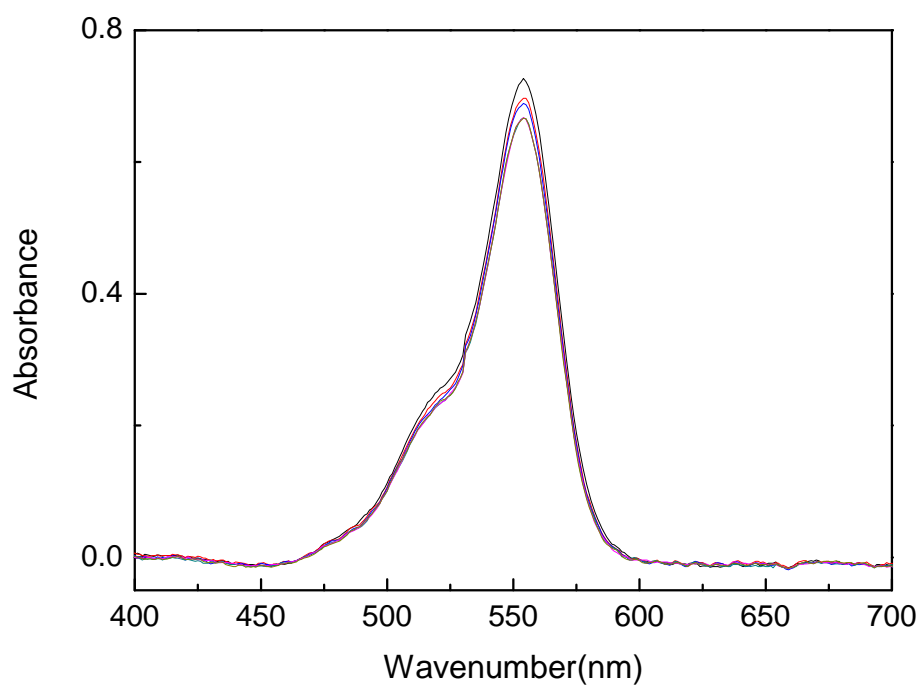

**Figure S7 | The temporal evolution of UV spectra of RhB solution (10 mg·L<sup>-1</sup>)**

**Table S1 | Maximum adsorption capacity of MG on various adsorbents**

| Adsorbent                                                                   | Maximum capacity<br>( $\text{mg}\cdot\text{g}^{-1}$ ) | Reference                                              |
|-----------------------------------------------------------------------------|-------------------------------------------------------|--------------------------------------------------------|
| MgO                                                                         | 1205.23                                               | <i>Mater. Lett.</i> , 2015, 141, 267                   |
| Activated carbon                                                            | 75.08                                                 | <i>Ind. Eng. Chem. Res.</i> , 1997, 36, 2207           |
| Zeolitic imidazole framework-67                                             | 2430                                                  | <i>Chemosphere</i> , 2015, 139, 624                    |
| Carboxylate group functionalized<br>multi-walled carbon nanotubes           | 49.45                                                 | <i>J. Mol. Liq.</i> , 2015, 206, 151                   |
| <i>rht</i> anionic metal–organic framework                                  | 502                                                   | <i>Chem. Commun.</i> , 2014, 50, 14674                 |
| Boron Nitride Spheres                                                       | 324                                                   | <i>ACS Appl. Mater.<br/>Interfaces</i> , 2015, 7, 1824 |
| Oxidized multiwalled carbon nanotubes                                       | 57.6                                                  | <i>RSC Adv.</i> , 2015,5, 38939                        |
| Hematite–reduced graphene oxide hybrid<br>materials                         | 438.8                                                 | <i>RSC Adv.</i> , 2015,5, 17336                        |
| AA–IA–APT hydrogel                                                          | 2433                                                  | <i>Chem. Eng. J.</i> , 2014, 257, 66                   |
| Carboxylate functionalized PAN<br>(PAN/NaOH/NaHCO <sub>3</sub> ) nanofibers | 1038                                                  | <i>Fiber Polym.</i> , 2014, 15, 2272                   |
| Zeolite–reduced graphene oxide                                              | 48.6                                                  | <i>Ind. Eng. Chem. Res.</i> , 2014, 53,<br>13711       |
| Sodium alginate-coated Fe <sub>3</sub> O <sub>4</sub> nanoparticles         | 47.84                                                 | <i>Int. J. Bio. Macromol.</i> , 2014, 69, 447          |
| Acid-activated sintering process red mud                                    | 336.4                                                 | <i>Appl. Clay. Sci.</i> , 2014, 93, 85                 |
| Titanium peroxide powder                                                    | 251.38                                                | <i>Appl. Surf. Sci.</i> , 2014, 292, 576               |
| NiO nanoflakes                                                              | 142.08                                                | <i>Chem. Eng. J.</i> , 2014, 239, 141                  |
| porous carbon nanosphere                                                    | 1455                                                  | <i>J. Hazard. Mater.</i> , 2013, 262, 256              |
| Aminopropyl functionalized magnesium<br>phyllosilicate clay                 | 334.80                                                | <i>J. Hazard. Mater.</i> , 2011, 192, 62               |
| Metal–organic framework MIL-100(Fe)                                         | 266                                                   | <i>J. Mater. Chem.</i> , 2012,22, 7449                 |
| ZnO/ZnFe <sub>2</sub> O <sub>4</sub> heterostructures                       | 4983                                                  | In this work                                           |



**Table S2 | Chemical information of the selected dyes**

|                                                                                    |                                                                                    |                                                                                      |
|------------------------------------------------------------------------------------|------------------------------------------------------------------------------------|--------------------------------------------------------------------------------------|
| malachite green (MG)                                                               | rhodamine (RhB)                                                                    | methyl orange (MO)                                                                   |
| $C_{23}H_{25}ClN_2$                                                                | $C_{28}H_{31}ClN_2O_3$                                                             | $C_{14}H_{14}N_3SO_3Na$                                                              |
| <i>Mw</i> : 364.92                                                                 | <i>Mw</i> : 479.01                                                                 | <i>Mw</i> : 327.33                                                                   |
| <i>Charge</i> : positive                                                           | <i>Charge</i> : positive                                                           | <i>Charge</i> : negative                                                             |
| 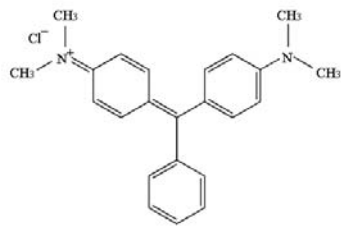  |   |   |
|  |  |  |

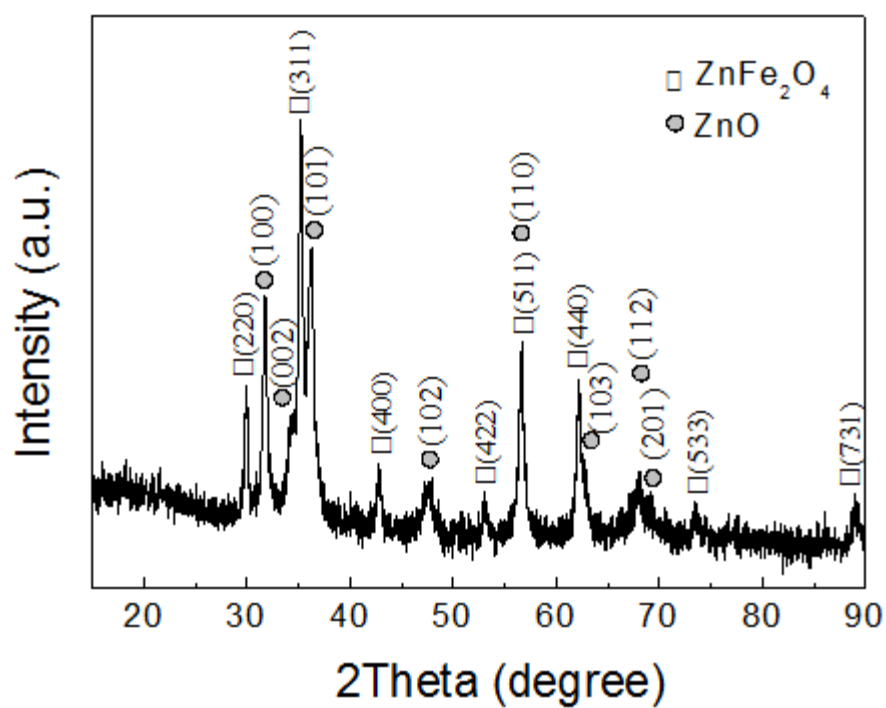

Figure S7 | XRD pattern of the ZnO/ZnFe<sub>2</sub>O<sub>4</sub> product obtained by thermal annealing at 500 °C with a ramping rate of 5 °C·min<sup>-1</sup>.

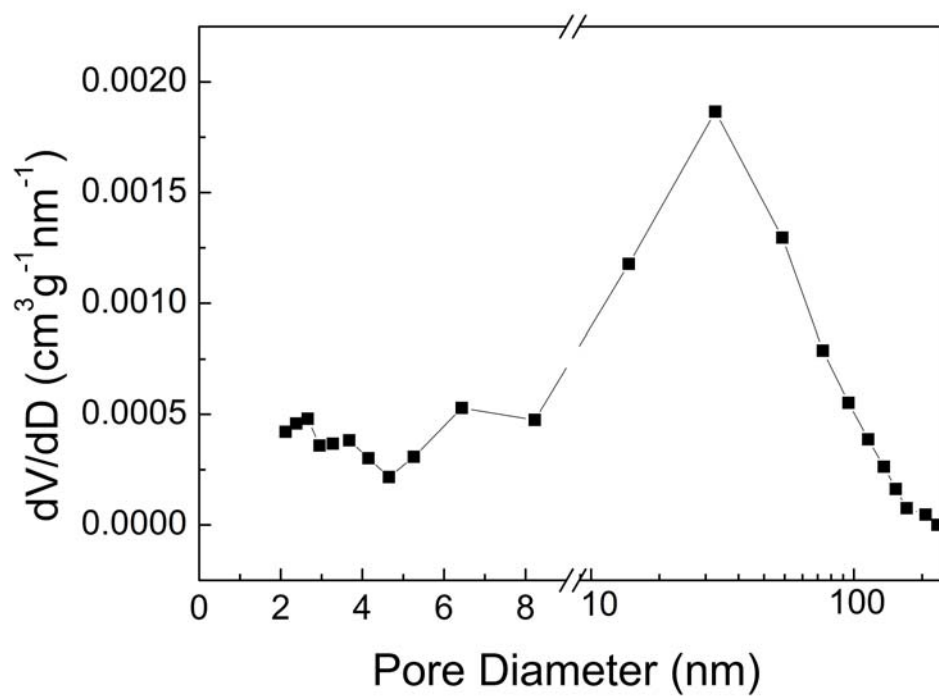

**Figure S8 | Pore size distribution of the ZnO/ZnFe<sub>2</sub>O<sub>4</sub> product obtained by thermal annealing at 500 °C with a ramping rate of 5 °C·min<sup>-1</sup>.**

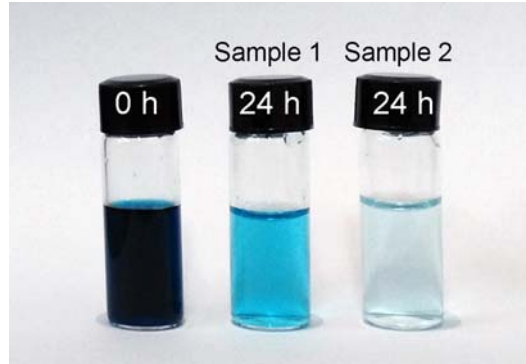

**Figure S9 | The colors change of the MG solutions for Sample 1 and Sample 2 after 24 h contact.**
